# Supplementary material
Source: publisher figshare collection journal article supplement (https://tandf.figshare.com/ndownloader/files/18513743)
Supplement: Supplementary file 1 [file 18513743]

**STEFANIA BONA**

She is an occupational therapist. She currently works at NEuroMuscular Omnicentre (NEMO) - Fondazione Serena Onlus in Milan. Her activities focus on the evaluation of aids that help maintaining neuromuscular patient’s autonomy.

**CHRISTIAN LUNETTA**

He is a Neurologist devoted to MND patients at the NEuroMuscular Omnicentre (NEMO) – Fondazione Serena Onlus in Milan. He is responsible for clinical care and research in ALS at NEMO Center in Milan. He is a member of ITALSGEN, a consortium devoted to performing genetic studies in ALS pts, and a member of EURALS group devoted to performing epidemiological studies in MND pts. He has served as a co-investigator in several clinical trials in MND pts. He is currently an Investigator in Phase1/2a Autologous Hematopoietic Stem Cells Transplantation (Cy-HSCT-ALS002) in ALS. He previously served as an Investigator on the CANALS Study, the EPOSS study, NET-SLA study, Lit-ALS Study Group, ALSTAR study, SLA_LAC study, PEP-ALS study (RCT on Physical Therapy in ALS), ONO-2506 study, STEMALS study, and Go-ALS study. He previously worked with Prof Silani at the IRCCS Istituto Auxologico Italiano, University of Milan, Milan. He received his medical degree and neurology certification both with honors from the University of Palermo Medical School. Over 50 papers in International journals (including 48 papers on journals indexed in Pubmed); many presentations at national and international meetings.

**GIORDANA DONVITO**

She is an occupational therapist. She currently works at NEuroMuscular Omnicentre (NEMO) - Fondazione Serena Onlus in Milan. Her main activity is focused on the rehabilitation with the aim to maintain and improve the neuromuscular patient’s autonomy in daily life activities, mobility and communication.

**FEDERICA COZZA**

Graduated with a BSc in Optics and Optometry at University of Milano Bicocca. She currently works at NeuroMuscolar Omnicentre (NEMO) Fondazione Serena Onlus in Milan, as an optometrist, collecting ocular data about patients affected by neuromuscular diseases. Her research interests focus on corneal endothelium and optical systems; she has recently acquired expertise in optometric analysis in people with motor disabilities. She has worked as a teaching assistant for the Degree Course in Optics and Optometry at University Milano Bicocca, in particular for the laboratories of "Principles and Practice of optometry" and " Optical instruments".

**IRENE MALBERTI**

She is an occupational therapist. She currently works at NEuroMuscular Omnicentre (NEMO) - Fondazione Serena Onlus in Milan. Her main activity is focused on the rehabilitation with the aim to maintain and improve the neuromuscular patient’s autonomy in daily life activities, mobility and communication.

**PAOLO VACCARI**

He has designed and developed various software applications for communications and education. At Auxilia since 2005 coordinates a work group that follows today more than 200 patients with ALS

for their assistive technologies. He has designed the SpheryKey, an innovative software application for people with ALS with impaired ocular movements. He has designed also SimplyMouse, a new application for the interaction through eye tracking systems with the Windows environment and the web browser. He is a member of AAATE, Association for the Advancement of Assistive Technology in Europe.

**ANDREA LIZIO**

Graduated in Biostatistics at the University of Milano Bicocca. He currently works at NEuroMuscular Omnicentre (NEMO) - Fondazione Serena Onlus in Milan. His research activity focuses on study design and statistical plans of several clinical trials performed in neuromuscular disease field. He contributes to the publication of peer-review scientific papers presented at national and international meetings.

**LUCIA GRECO**

She is a psychologist with expertise in neuropsychology. She is currently working at NEuroMuscular Omnicentre (NEMO) – Fondazione Serena Onlus in Milan.

Her activities focus on the evaluation and rehabilitation of cognitive functioning in neuromuscular patients**.**

**ELENA CARRARO**

Graduated in Medicine and Surgery at the University of Padua, Italy, in 2005; Residency in Physical Medicine and Rehabilitation, at the University of Padua, for 4 years.

She currently works at Nemo Clinical Center (NEuroMuscular Omnicentre) - Serena Foundation of Milan, Italy.

Her research interests focus on neurological rehabilitation (acquired and congenital brain injuries, neuromuscular pathologies); motion and posture analysis; evaluation and treatment of movement disorders, in particularly spasticity; evaluation and rehabilitative treatment of respiratory complications in patients suffering from neurological pathology.

**VALERIA ADA SANSONE**

She is a neurologist devoted to NMD patients, in particular to those affected by myotonic dystrophy, at the NEuroMuscular Omnicentre (NEMO) – Fondazione Serena Onlus in Milan. She is clinical director at NEMO Centre in Milan and associated professor at University of Milan, with 98 peer-review scientific papers (source: Scopus, April 2019).
